# Supplementary material for: Proportional scaling molecular dynamics simulations of the wetting experiments of water droplets on ink-patterned printing paper
Source: Royal Society of Chemistry journal article supplement (doi:10.1039/d3ra05921a), 2023-01-01
Supplement: d3ra05921a1.pdf [file d3ra05921a1.pdf]

## Supplementary Information

### **Proportional scaling molecular dynamics simulations of the wetting experiments of water droplets on ink-patterned printing paper**

Xiao Wang <sup>a</sup>, Lijun Chen <sup>a</sup>, Chunlai Zhang <sup>a</sup>, Xiping Zhang <sup>b</sup>, Yintao Wu <sup>a</sup>, Bo  
Wang<sup>a,\*</sup>

<sup>a</sup> Key Laboratory of Advanced Functional Materials, Education Ministry of China, Faculty of Materials and Manufacturing, Beijing University of Technology, Beijing 100124, China

<sup>b</sup> China Datang Corporation New Energy Science and Technology Research Institute Co., Ltd, Beijing 100040, China

\* Corresponding author. E-mail address: [wangbo@bjut.edu.cn](mailto:wangbo@bjut.edu.cn) (B. Wang).

**Table S1.** Square pattern structure and contact angle measurements. The width length  $a$  is the square side length of the ink pattern. The interval length  $b$  is the square interval length.

| Sample code | Width length $a$<br>( $\mu\text{m}$ ) | Interval length $b$<br>( $\mu\text{m}$ ) | Contact angle<br>(degree) |
|-------------|---------------------------------------|------------------------------------------|---------------------------|
| QW2115      | 240                                   | 119                                      | 61.65                     |
| QW2120      | 240                                   | 184                                      | 58.53                     |
| QW2125      | 240                                   | 219                                      | 58.97                     |
| QW2130      | 240                                   | 251                                      | 58.68                     |
| QW2135      | 240                                   | 300                                      | 58.52                     |
| QW2140      | 240                                   | 367                                      | 56.36                     |
| QW2145      | 240                                   | 418                                      | 56.30                     |
| QW3115      | 342                                   | 118                                      | 66.12                     |
| QW3120      | 342                                   | 166                                      | 63.77                     |
| QW3125      | 342                                   | 197                                      | 62.76                     |
| QW3130      | 342                                   | 255                                      | 56.97                     |
| QW3135      | 342                                   | 308                                      | 58.72                     |
| QW3140      | 342                                   | 346                                      | 56.10                     |
| QW3145      | 342                                   | 390                                      | 57.80                     |
| QW4115      | 444                                   | 111                                      | 61.62                     |
| QW4120      | 444                                   | 151                                      | 62.93                     |
| QW4125      | 444                                   | 218                                      | 62.89                     |
| QW4130      | 444                                   | 257                                      | 60.12                     |
| QW4135      | 444                                   | 314                                      | 58.03                     |
| QW4140      | 444                                   | 350                                      | 58.35                     |
| QW4145      | 444                                   | 373                                      | 61.22                     |
| QW5115      | 551                                   | 123                                      | 63.65                     |
| QW5120      | 551                                   | 168                                      | 60.35                     |
| QW5125      | 551                                   | 206                                      | 60.66                     |
| QW5130      | 551                                   | 252                                      | 60.24                     |
| QW5135      | 551                                   | 311                                      | 58.04                     |
| QW5140      | 551                                   | 356                                      | 58.14                     |
| QW5145      | 551                                   | 390                                      | 57.07                     |

**Table S2.** Grid pattern structure and contact angle measurements. The width length  $a$  is the width of the grid ink pattern. The interval length  $b$  is the interval width of printing paper.

| <b>Sample code</b> | <b>Width length <math>a</math><br/>(<math>\mu\text{m}</math>)</b> | <b>Interval length <math>b</math><br/>(<math>\mu\text{m}</math>)</b> | <b>Contact angle<br/>(degree)</b> |
|--------------------|-------------------------------------------------------------------|----------------------------------------------------------------------|-----------------------------------|
| <b>GH131V95</b>    | 131                                                               | 95                                                                   | 62.23                             |
| <b>GH137V92</b>    | 137                                                               | 92                                                                   | 63.92                             |
| <b>GH151V149</b>   | 151                                                               | 149                                                                  | 63.41                             |
| <b>GH156V137</b>   | 156                                                               | 137                                                                  | 62.37                             |
| <b>GH209V189</b>   | 209                                                               | 189                                                                  | 61.44                             |
| <b>GH234V196</b>   | 234                                                               | 196                                                                  | 61.83                             |
| <b>GH261V136</b>   | 261                                                               | 136                                                                  | 63.38                             |
| <b>GH189V149</b>   | 189                                                               | 149                                                                  | 61.43                             |
| <b>GH160V144</b>   | 160                                                               | 144                                                                  | 61.64                             |
| <b>GH176V178</b>   | 176                                                               | 178                                                                  | 61.55                             |
| <b>GH207V191</b>   | 207                                                               | 191                                                                  | 61.52                             |
| <b>GH133V79</b>    | 133                                                               | 79                                                                   | 61.39                             |
| <b>GH244V119</b>   | 244                                                               | 119                                                                  | 63.20                             |
| <b>GH177V115</b>   | 177                                                               | 115                                                                  | 61.01                             |
| <b>GH179V140</b>   | 179                                                               | 140                                                                  | 61.90                             |
| <b>GH168V138</b>   | 168                                                               | 138                                                                  | 61.85                             |
| <b>GH205V171</b>   | 205                                                               | 171                                                                  | 62.53                             |
| <b>GH231V180</b>   | 231                                                               | 180                                                                  | 61.92                             |
| <b>GH282V232</b>   | 282                                                               | 232                                                                  | 60.87                             |
| <b>GH207V104</b>   | 207                                                               | 104                                                                  | 63.83                             |
| <b>GH182V114</b>   | 182                                                               | 114                                                                  | 63.14                             |
| <b>GH177V144</b>   | 177                                                               | 144                                                                  | 61.29                             |
| <b>GH181V140</b>   | 181                                                               | 140                                                                  | 62.02                             |
| <b>GH210V151</b>   | 210                                                               | 151                                                                  | 62.31                             |
| <b>GH250V176</b>   | 250                                                               | 176                                                                  | 61.41                             |
| <b>GH304V250</b>   | 304                                                               | 250                                                                  | 61.49                             |
| <b>GH295V262</b>   | 295                                                               | 262                                                                  | 60.95                             |

**Table S3.** Stripe pattern structure and contact angle measurements. The width length  $a$  is the width of the stripe ink pattern. The interval length  $b$  is the interval width of printing paper.

| <b>Sample code</b> | <b>Width length <math>a</math><br/>(<math>\mu\text{m}</math>)</b> | <b>Interval length <math>b</math><br/>(<math>\mu\text{m}</math>)</b> | <b>Contact angle<br/>(degree)</b> |
|--------------------|-------------------------------------------------------------------|----------------------------------------------------------------------|-----------------------------------|
| SW109I141          | 109                                                               | 141                                                                  | 55.64                             |
| SW109I191          | 109                                                               | 191                                                                  | 55.33                             |
| SW109I241          | 109                                                               | 241                                                                  | 53.16                             |
| SW138I112          | 138                                                               | 112                                                                  | 58.32                             |
| SW138I162          | 138                                                               | 162                                                                  | 56.76                             |
| SW138I212          | 138                                                               | 212                                                                  | 54.60                             |
| SW158I92           | 158                                                               | 92                                                                   | 63.64                             |
| SW158I142          | 158                                                               | 142                                                                  | 57.40                             |
| SW158I192          | 158                                                               | 192                                                                  | 57.23                             |
| SW173I77           | 173                                                               | 77                                                                   | 66.23                             |
| SW173I127          | 173                                                               | 127                                                                  | 61.67                             |
| SW173I177          | 173                                                               | 177                                                                  | 56.52                             |
| SW190I60           | 190                                                               | 60                                                                   | 63.58                             |
| SW190I110          | 190                                                               | 110                                                                  | 64.37                             |
| SW190I160          | 190                                                               | 160                                                                  | 57.84                             |
| SW206I44           | 206                                                               | 44                                                                   | 65.20                             |
| SW206I94           | 206                                                               | 94                                                                   | 62.14                             |
| SW206I144          | 206                                                               | 144                                                                  | 61.49                             |
| SW245I5            | 245                                                               | 5                                                                    | 65.39                             |
| SW245I55           | 245                                                               | 55                                                                   | 64.55                             |
| SW245I105          | 245                                                               | 105                                                                  | 63.83                             |

## Grid and stripe pattern surface in MD simulation

For grid-pattern, the corresponding width of ink-patterned grid  $a$  is approximated in the range of  $1.5 a_{Cu}$  to  $4.0 a_{Cu}$ . The square interval length  $b$  is approximated in the range of  $1.5 a_{Cu}$  to  $3.5 a_{Cu}$ . Thus, there are 15 sets of grid patterns with different  $b/a$  combinations to be simulated (shown in Fig. S1).

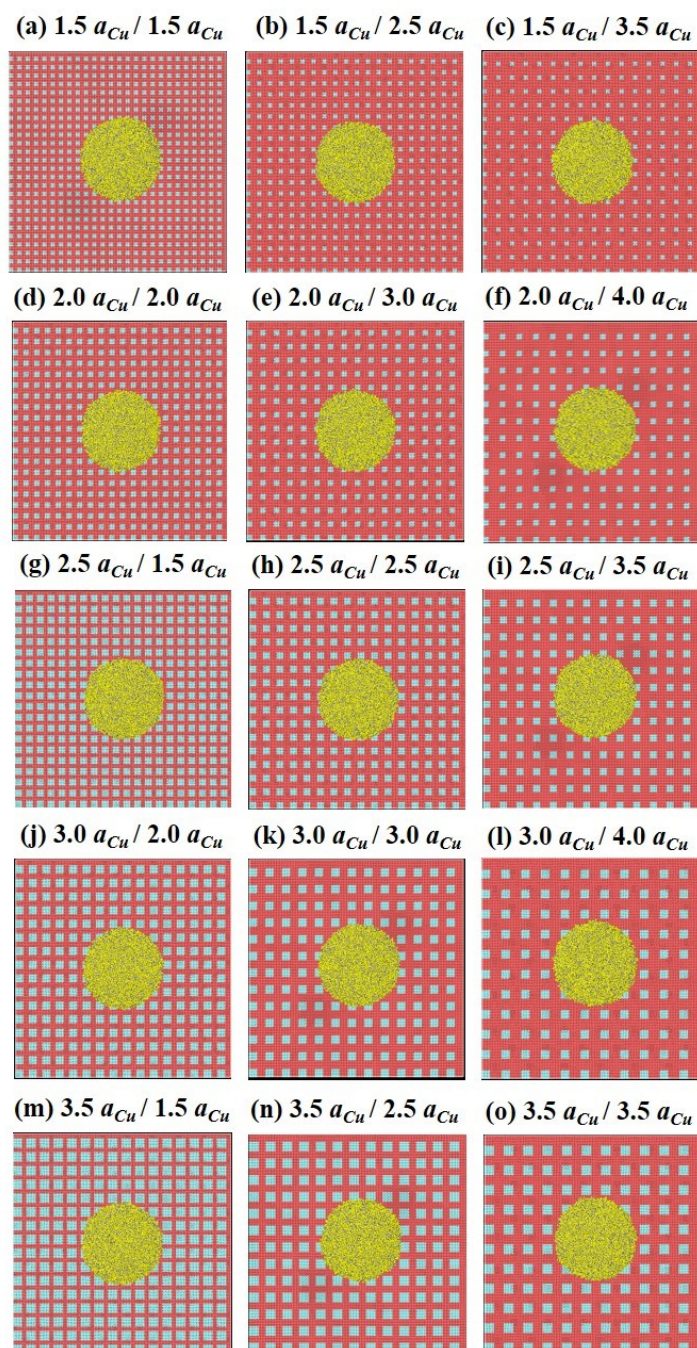

**Fig. S1.** Top view of ink grid-pattern surface and water droplet at the beginning of water droplet wetting MD simulation. The descriptions behind the (a-o) are  $b/a$ . The  $a$  is the width of the ink-patterned grid, and  $b$  is the square side length of the printing paper. The red atoms stand for the ink surface, and the azure atoms stand for the printing paper surface. The yellow and blue atoms stand for the oxygen and hydrogen atoms in water, respectively.

For stripe-pattern, the corresponding stripe width of ink-pattern  $a$  is approximately in the range of  $1.5 a_{Cu}$  to  $3.5 a_{Cu}$ . The stripe interval width of printing paper  $b$  is approximately in the range of  $1.5 a_{Cu}$  to  $4.0 a_{Cu}$ . Thus, there are 15 sets of grid patterns with different  $b/a$  combination to be simulated (shown in Fig. S2).

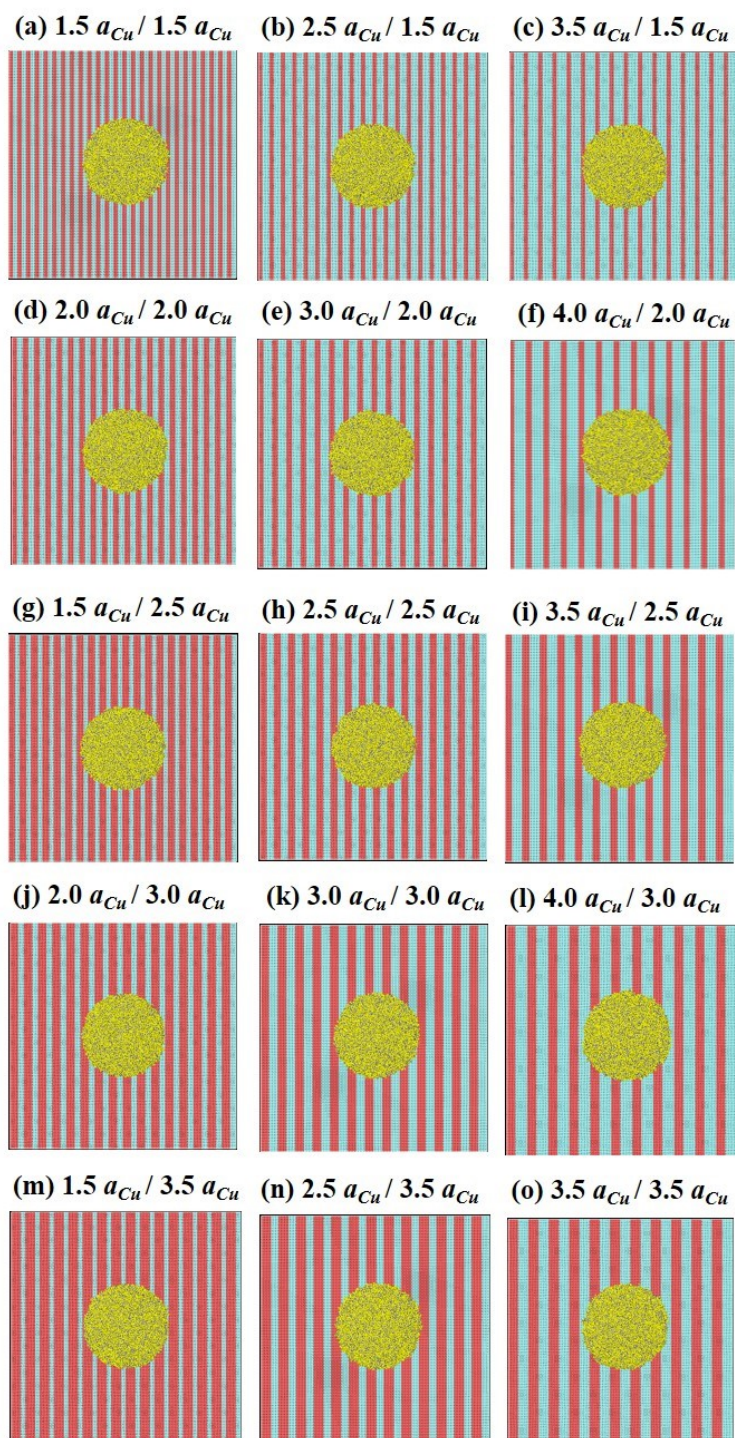

**Fig. S2.** Top view of ink stripe-pattern surface and water droplet at the beginning of water droplet wetting MD simulation. The descriptions behind the (a-o) are  $b/a$ . The  $a$  is the stripe width of the ink pattern, and  $b$  is the stripe interval width of the printing paper. The red atoms stand for the ink surface, and the azure atoms stand for the printing paper surface. The yellow and blue atoms stand for the oxygen and hydrogen atoms in water, respectively.
